# Supplementary material for: CHRM4/AKT/MYCN upregulates interferon alpha-17 in the tumor microenvironment to promote neuroendocrine differentiation of prostate cancer
Source: PubMed Central journal article supplement (PMC10160040; doi:10.1038/s41419-023-05836-7), 2023-05-04

Fig. 1A

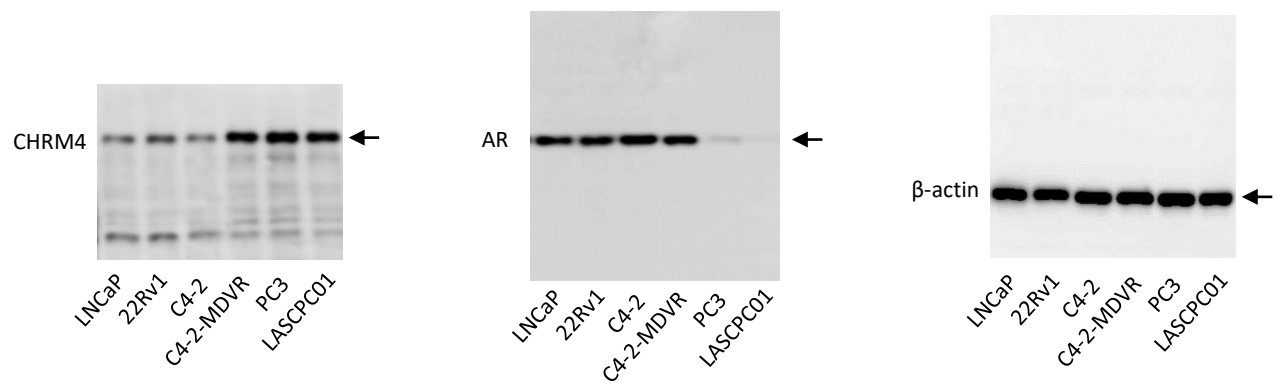

Fig. 1E

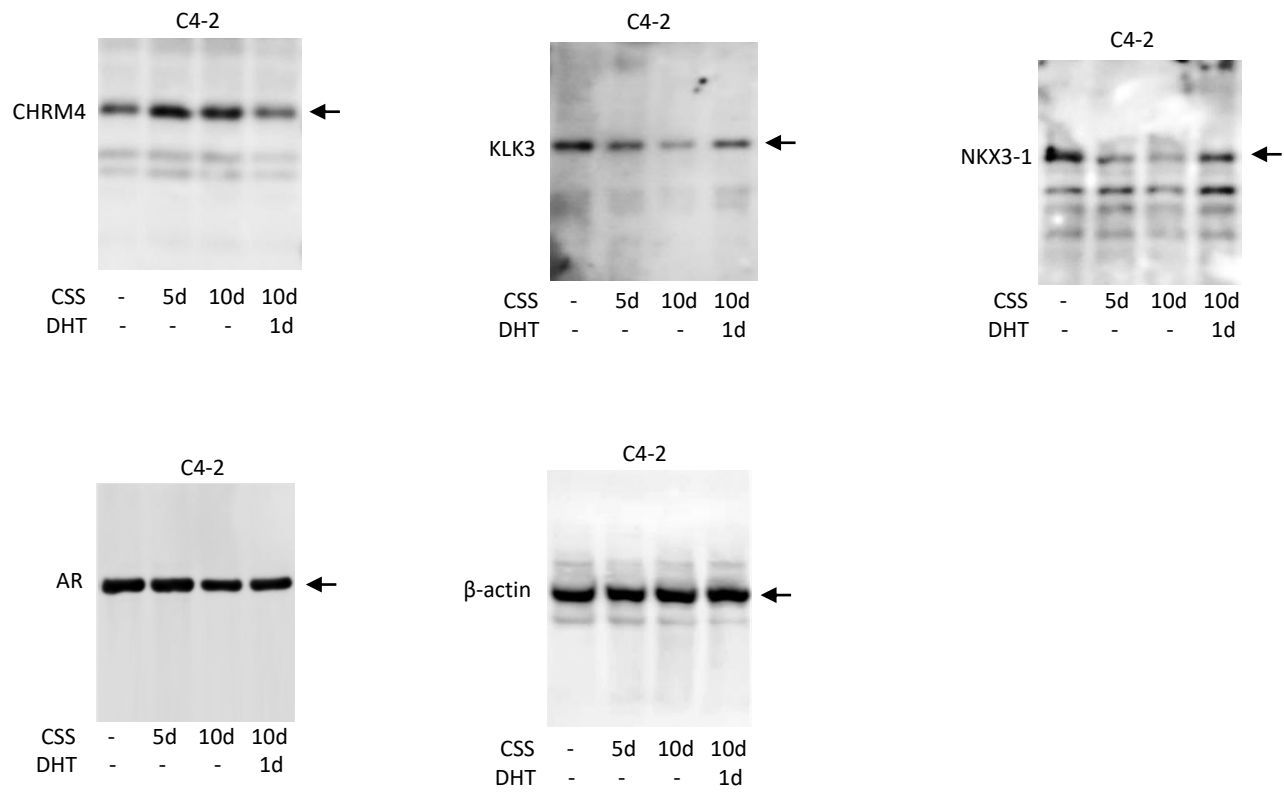

Fig. 1F

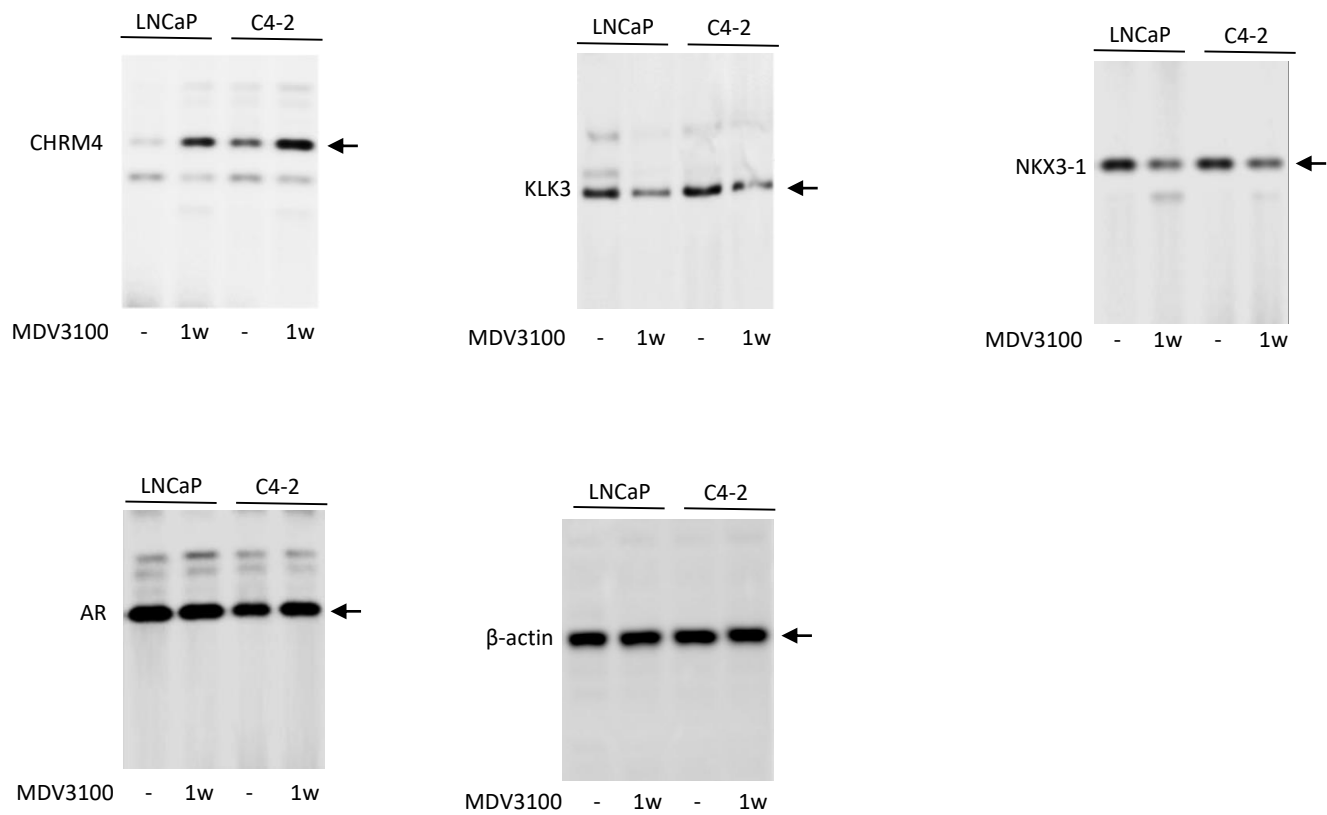

Fig. 3C

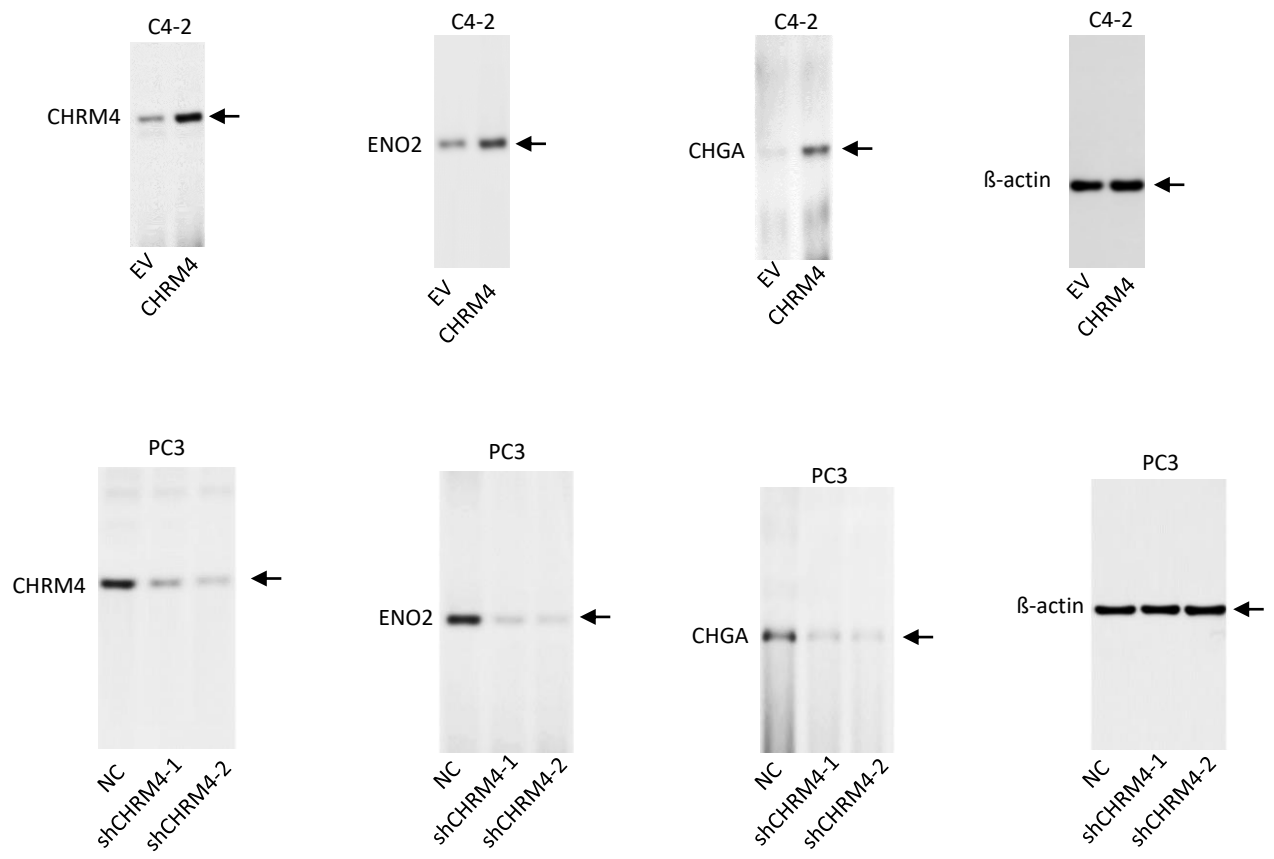

Fig. 4I

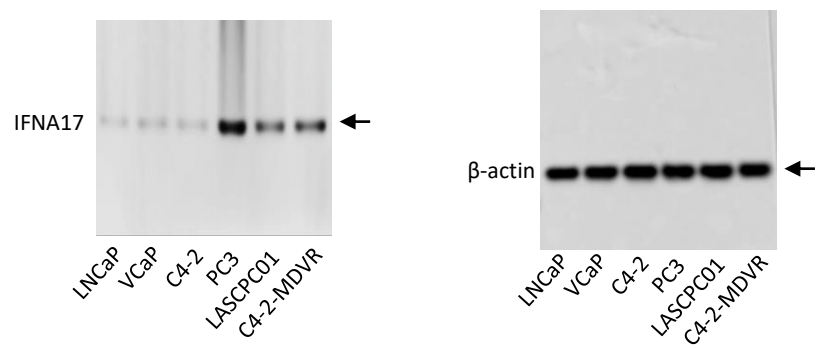

Fig. 5D

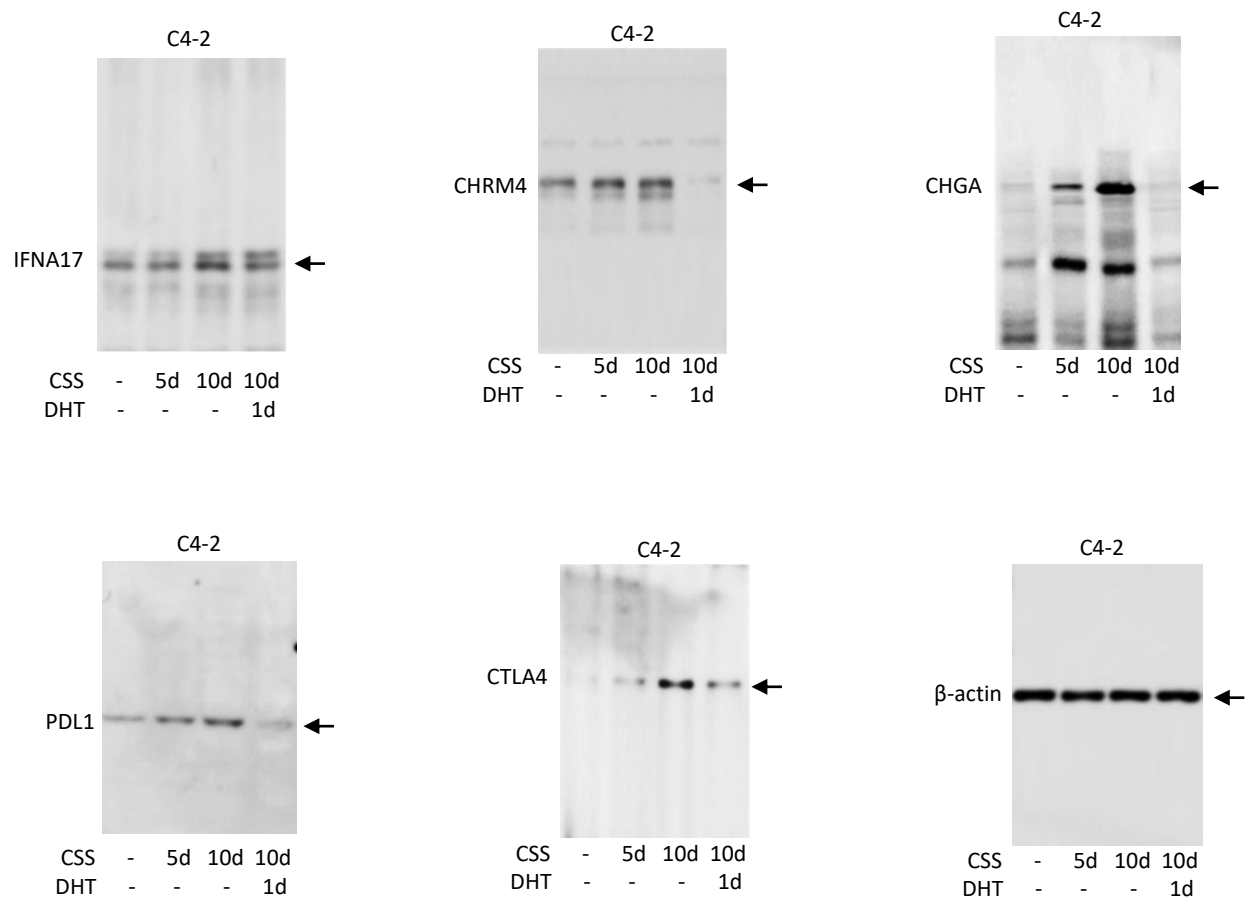

Fig. 5F

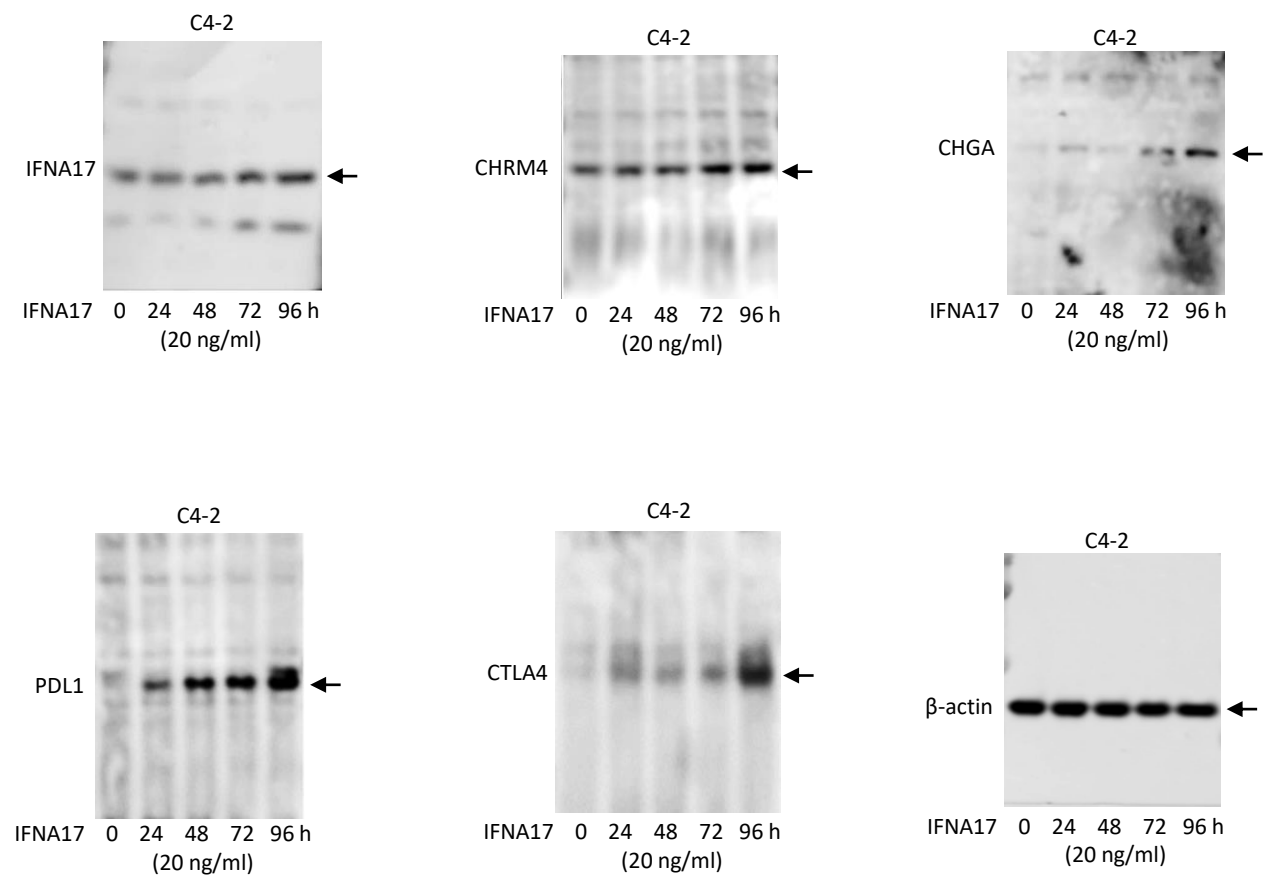

Fig. 5G

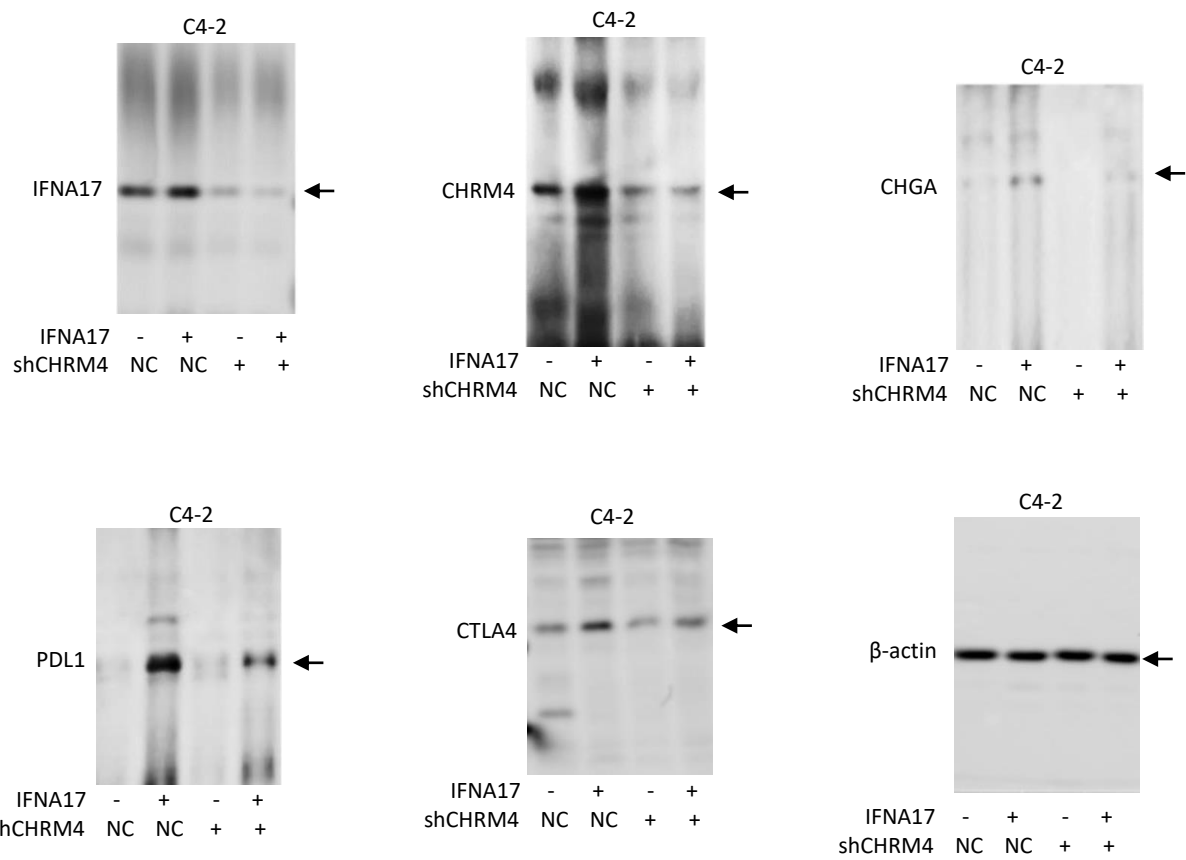

Fig. 5L

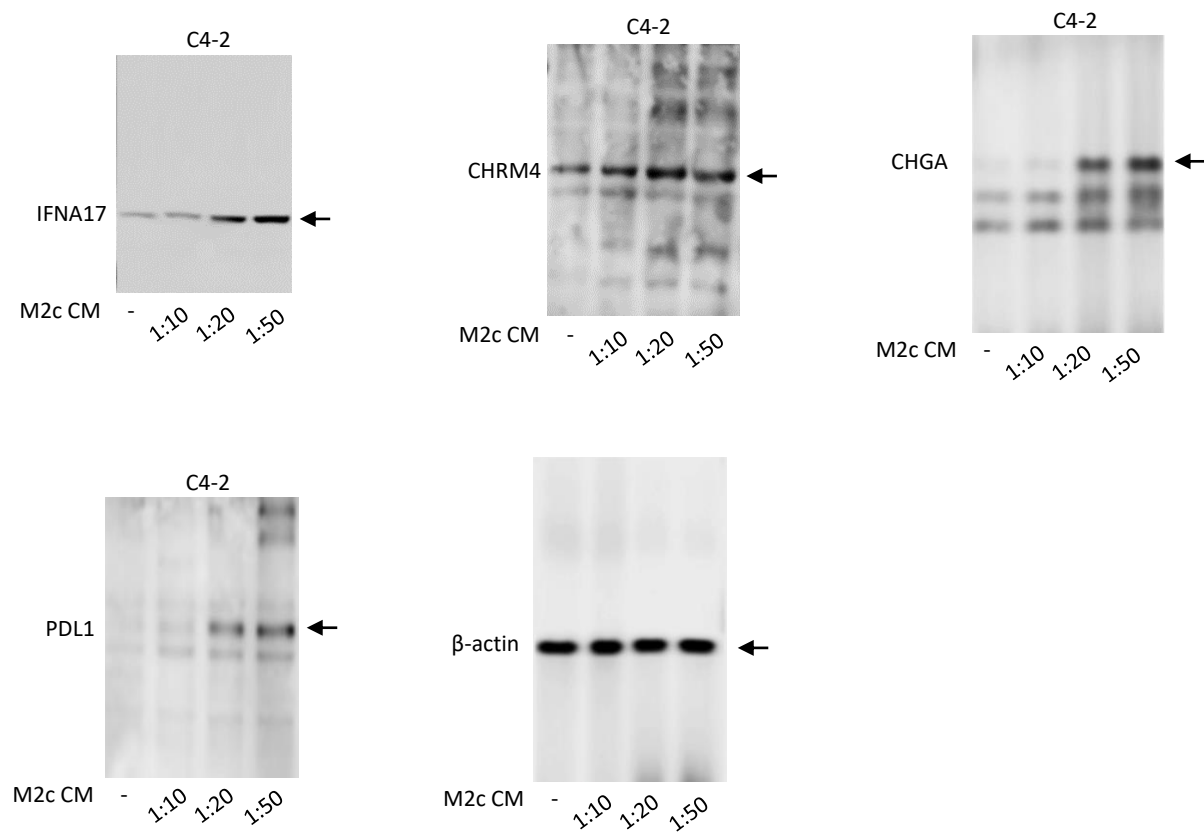

Fig. 6A

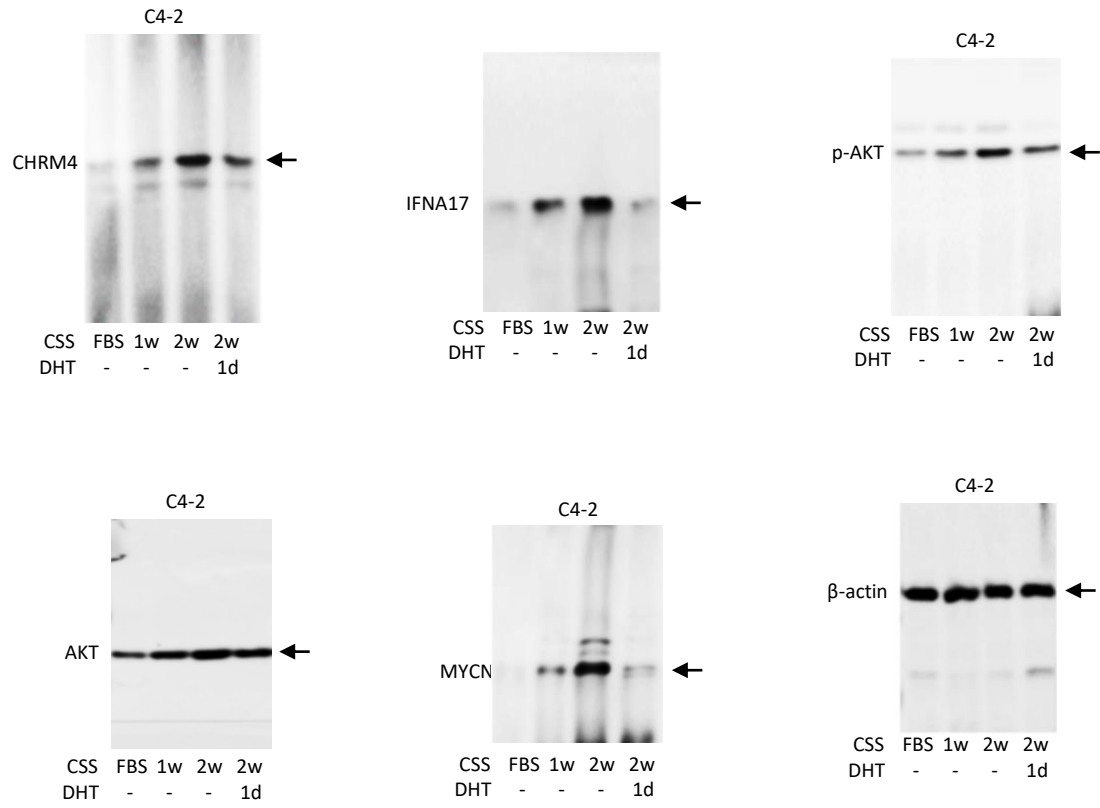

Fig. 6B

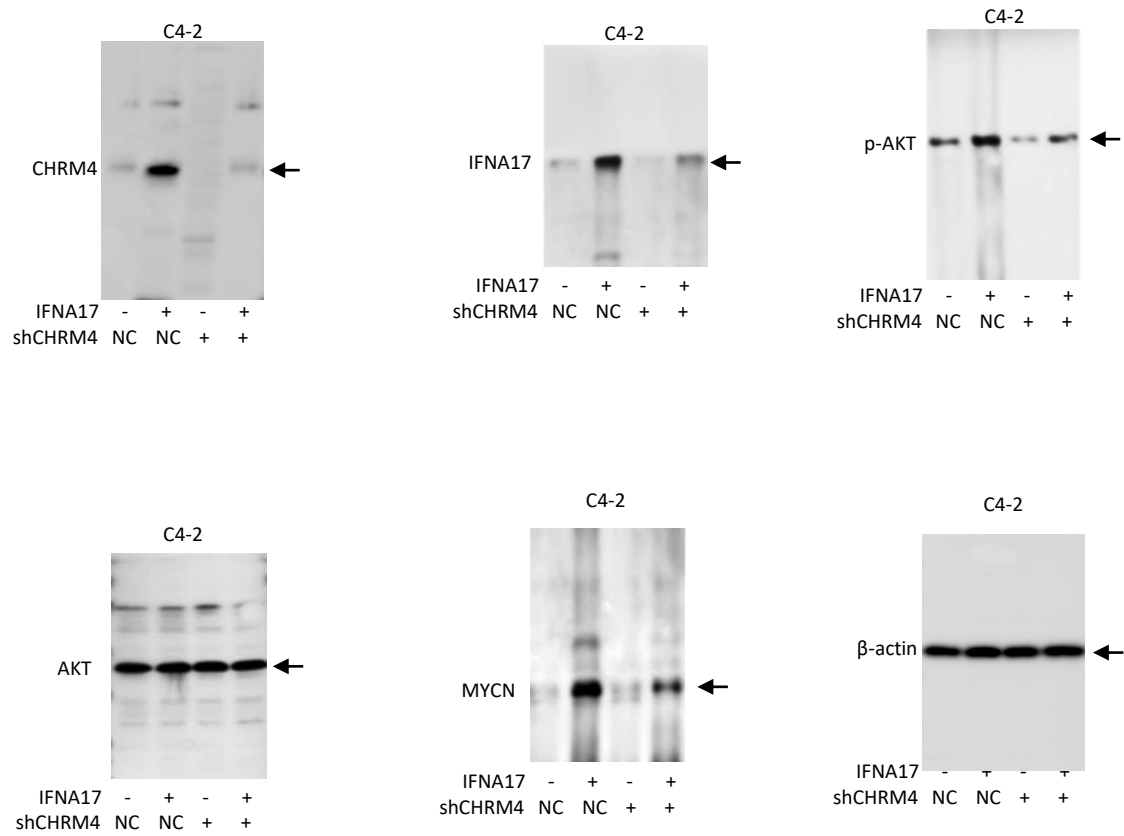

Supplement: 41419_2023_5836_MOESM2_ESM.pdf [file 41419_2023_5836_MOESM2_ESM.pdf]
